# Supplementary material
Source: PubMed Central journal article supplement (PMC3589231)
Supplement: supp_112.105346_biolreprod.112.105346-2.pdf [file supp_112.105346_biolreprod.112.105346-2.pdf]

Supplemental Table S1. WIN 18,446 treatment only regimes.

| <b>Animal Age at Start of Treatment</b> | <b>Number of consecutive daily WIN 18,446 treatments</b> | <b>Recovery Period</b> | <b>Figure</b>                    |
|-----------------------------------------|----------------------------------------------------------|------------------------|----------------------------------|
| Adult (approx. 90 dpp)                  | 3                                                        | 24 hours               | Fig. 1A – 1D                     |
| Adult (approx. 90 dpp)                  | 3                                                        | 26 days                | Fig. 1E – 1G                     |
| 2 dpp                                   | 1                                                        | 24 hours               | Fig. 2A – H                      |
| 2 dpp                                   | 3                                                        | 24 hours               | Supplemental Fig. S1             |
| 2 dpp                                   | 7                                                        | 24 hours               | 2I – R, Fig. 3, Fig. 5A, Fig. 5E |
| 2 dpp                                   | 14                                                       | 24 hours               | Fig. 4                           |

Supplemental Table S2. WIN 18,446 treatment plus RA injection regimes.\*

| <b>Animal age at start of treatment</b> | <b>Number of consecutive daily WIN 18,446 treatments</b> | <b>Day of RA injection</b> | <b>Recovery period after RA injection</b> | <b>Figure</b>    |
|-----------------------------------------|----------------------------------------------------------|----------------------------|-------------------------------------------|------------------|
| Adult (approx. 90 dpp)                  | 8                                                        | Day 9                      | 26 days                                   | Fig. 1H – K      |
| 2 dpp                                   | 7                                                        | Day 8                      | 24 hours                                  | Fig. 5B, Fig. 5F |
| 2 dpp                                   | 7                                                        | Day 8                      | 4 days                                    | Fig. 5C, Fig. 5G |
| 2 dpp                                   | 7                                                        | Day 8                      | 8 days                                    | Fig. 5D, Fig. 5H |
| 2 dpp                                   | 7                                                        | Day 8                      | 42 days                                   | Fig. 6A – D      |
| 2 dpp                                   | 7                                                        | Day 8                      | 42 – 50 days                              | Fig. 7           |
| 2 dpp                                   | 7                                                        | Day 8                      | 90 days                                   | Fig. 6E – G      |

\*RA injections always took place 24 hours after the last daily WIN 18,446 treatment. All animals only received one RA injection.
